# Supplementary material for: TM4SF1 promotes esophageal squamous cell carcinoma metastasis by interacting with integrin α6
Source: PubMed Central journal article supplement (PMC9283456; doi:10.1038/s41419-022-05067-2), 2022-07-14

**Figure 1C**

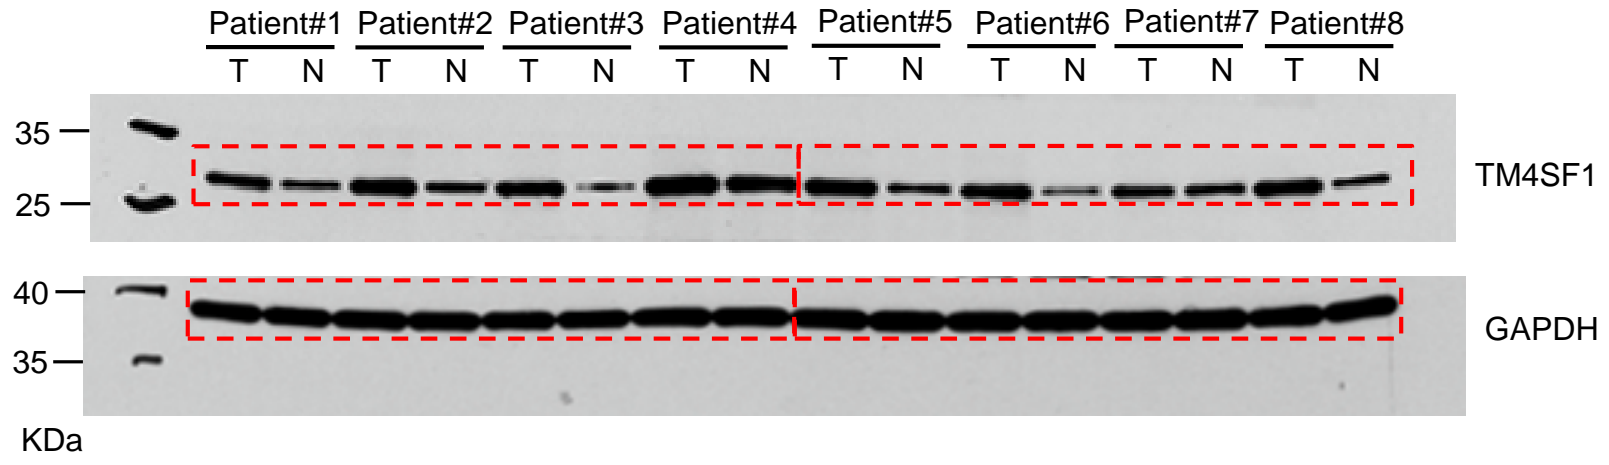

**Figure 2A**

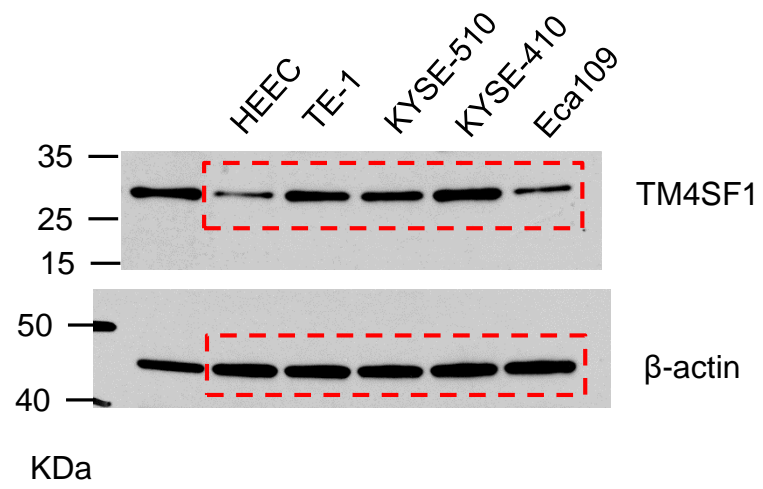

**Figure 2B**

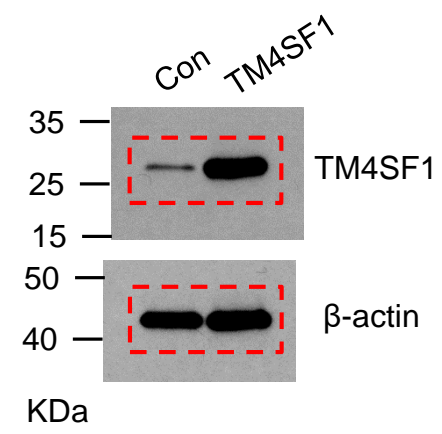

**Figure 2D**

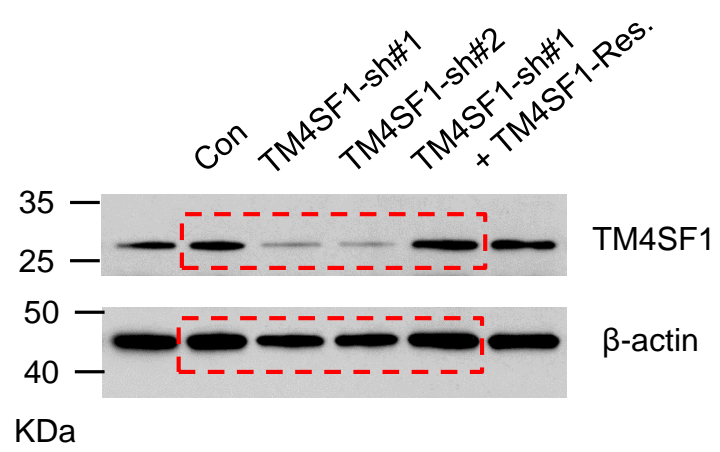

**Figure 4A**

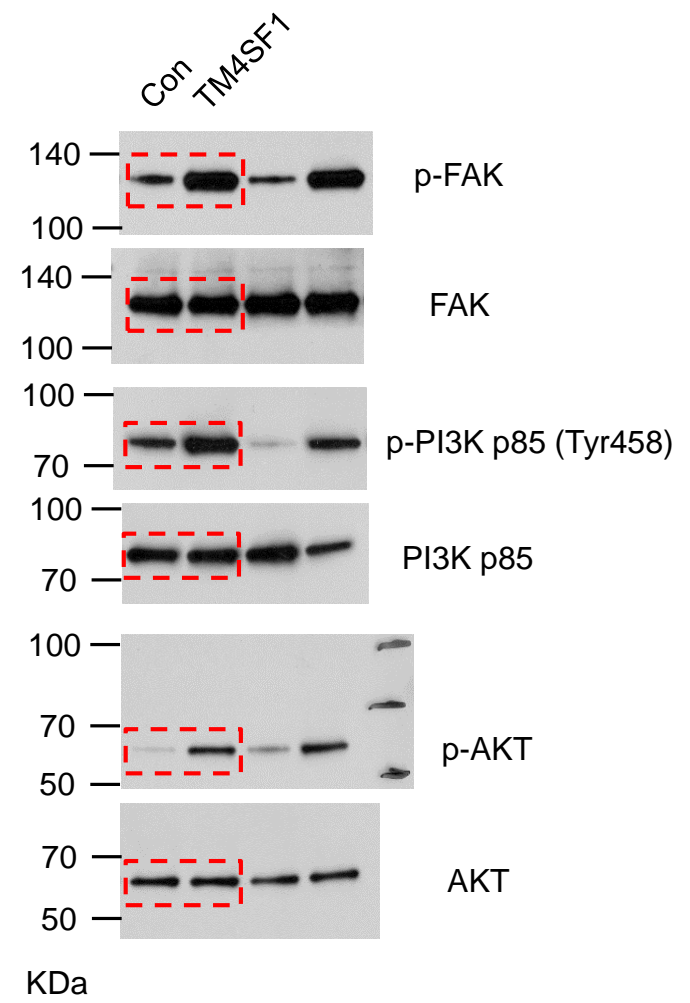

**Figure 4C**

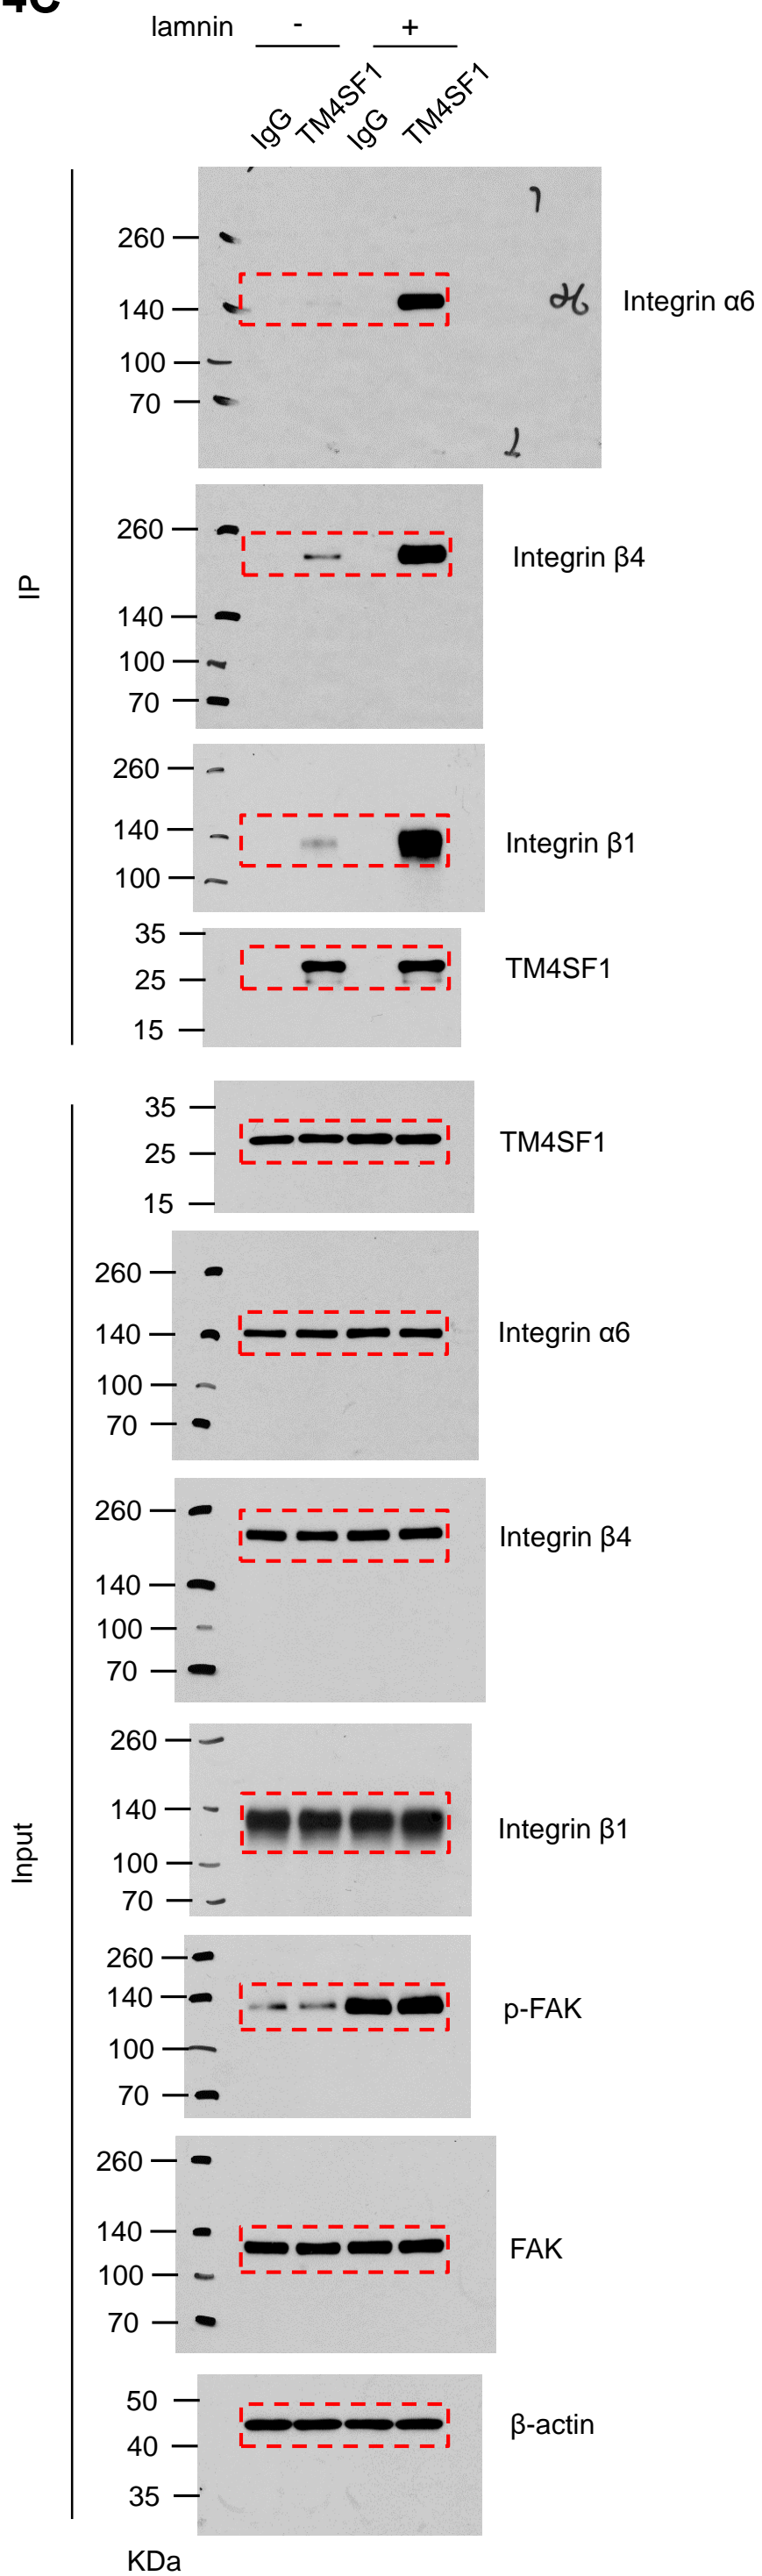

**Figure 4D**

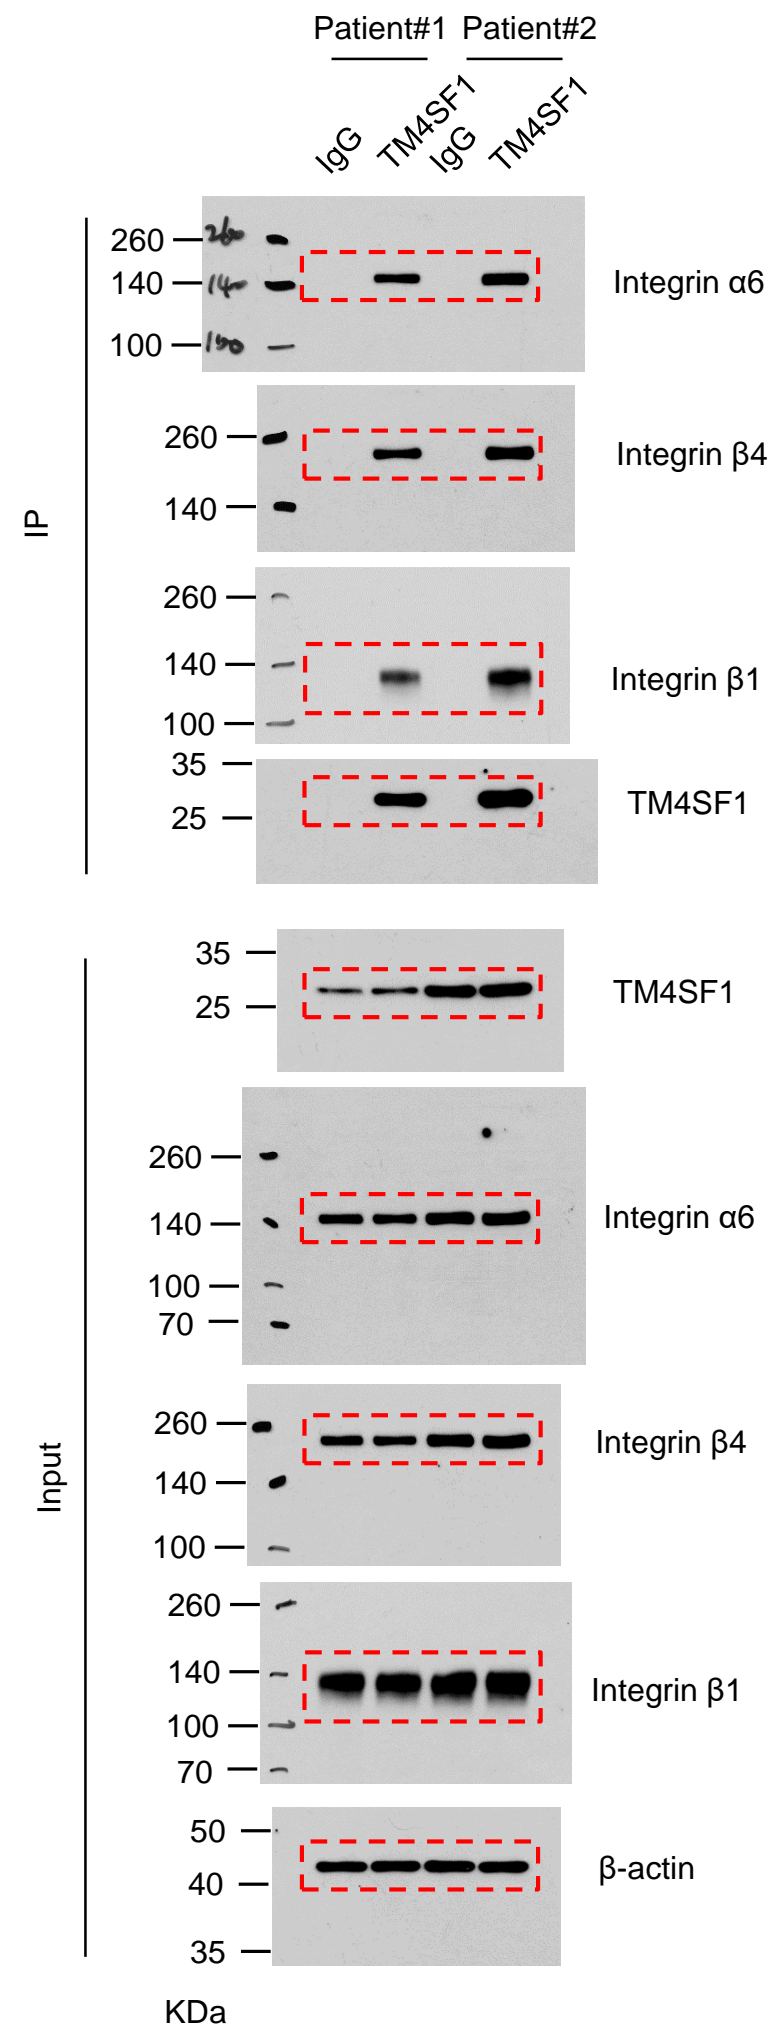

**Figure 5A**

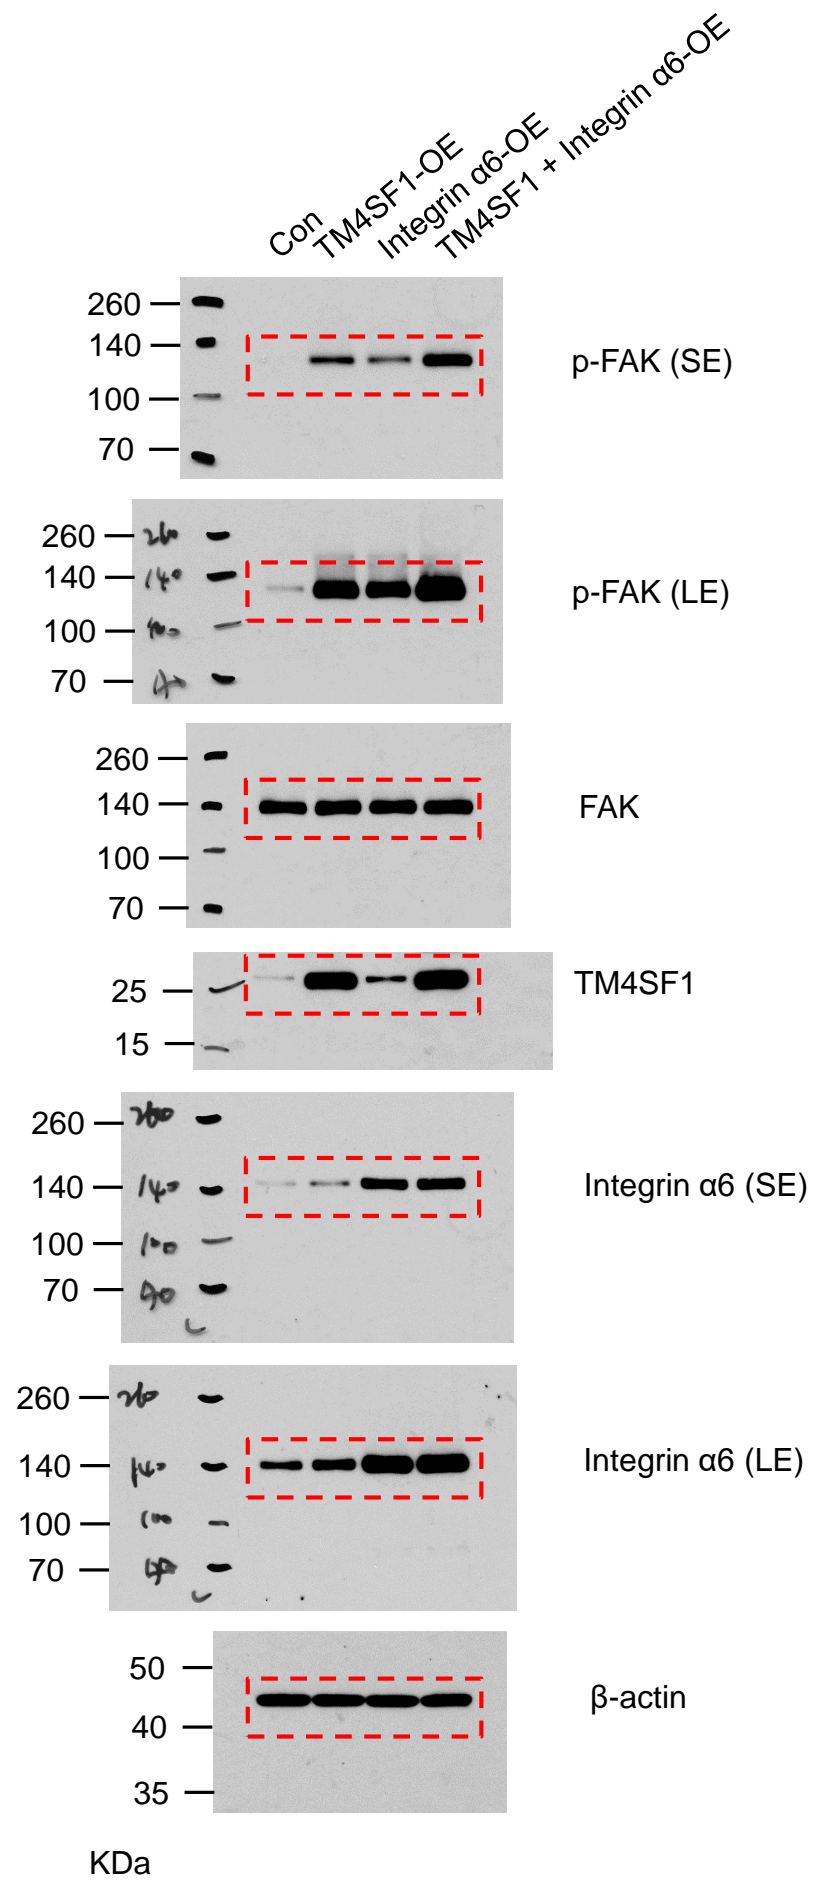

**Figure 5B**

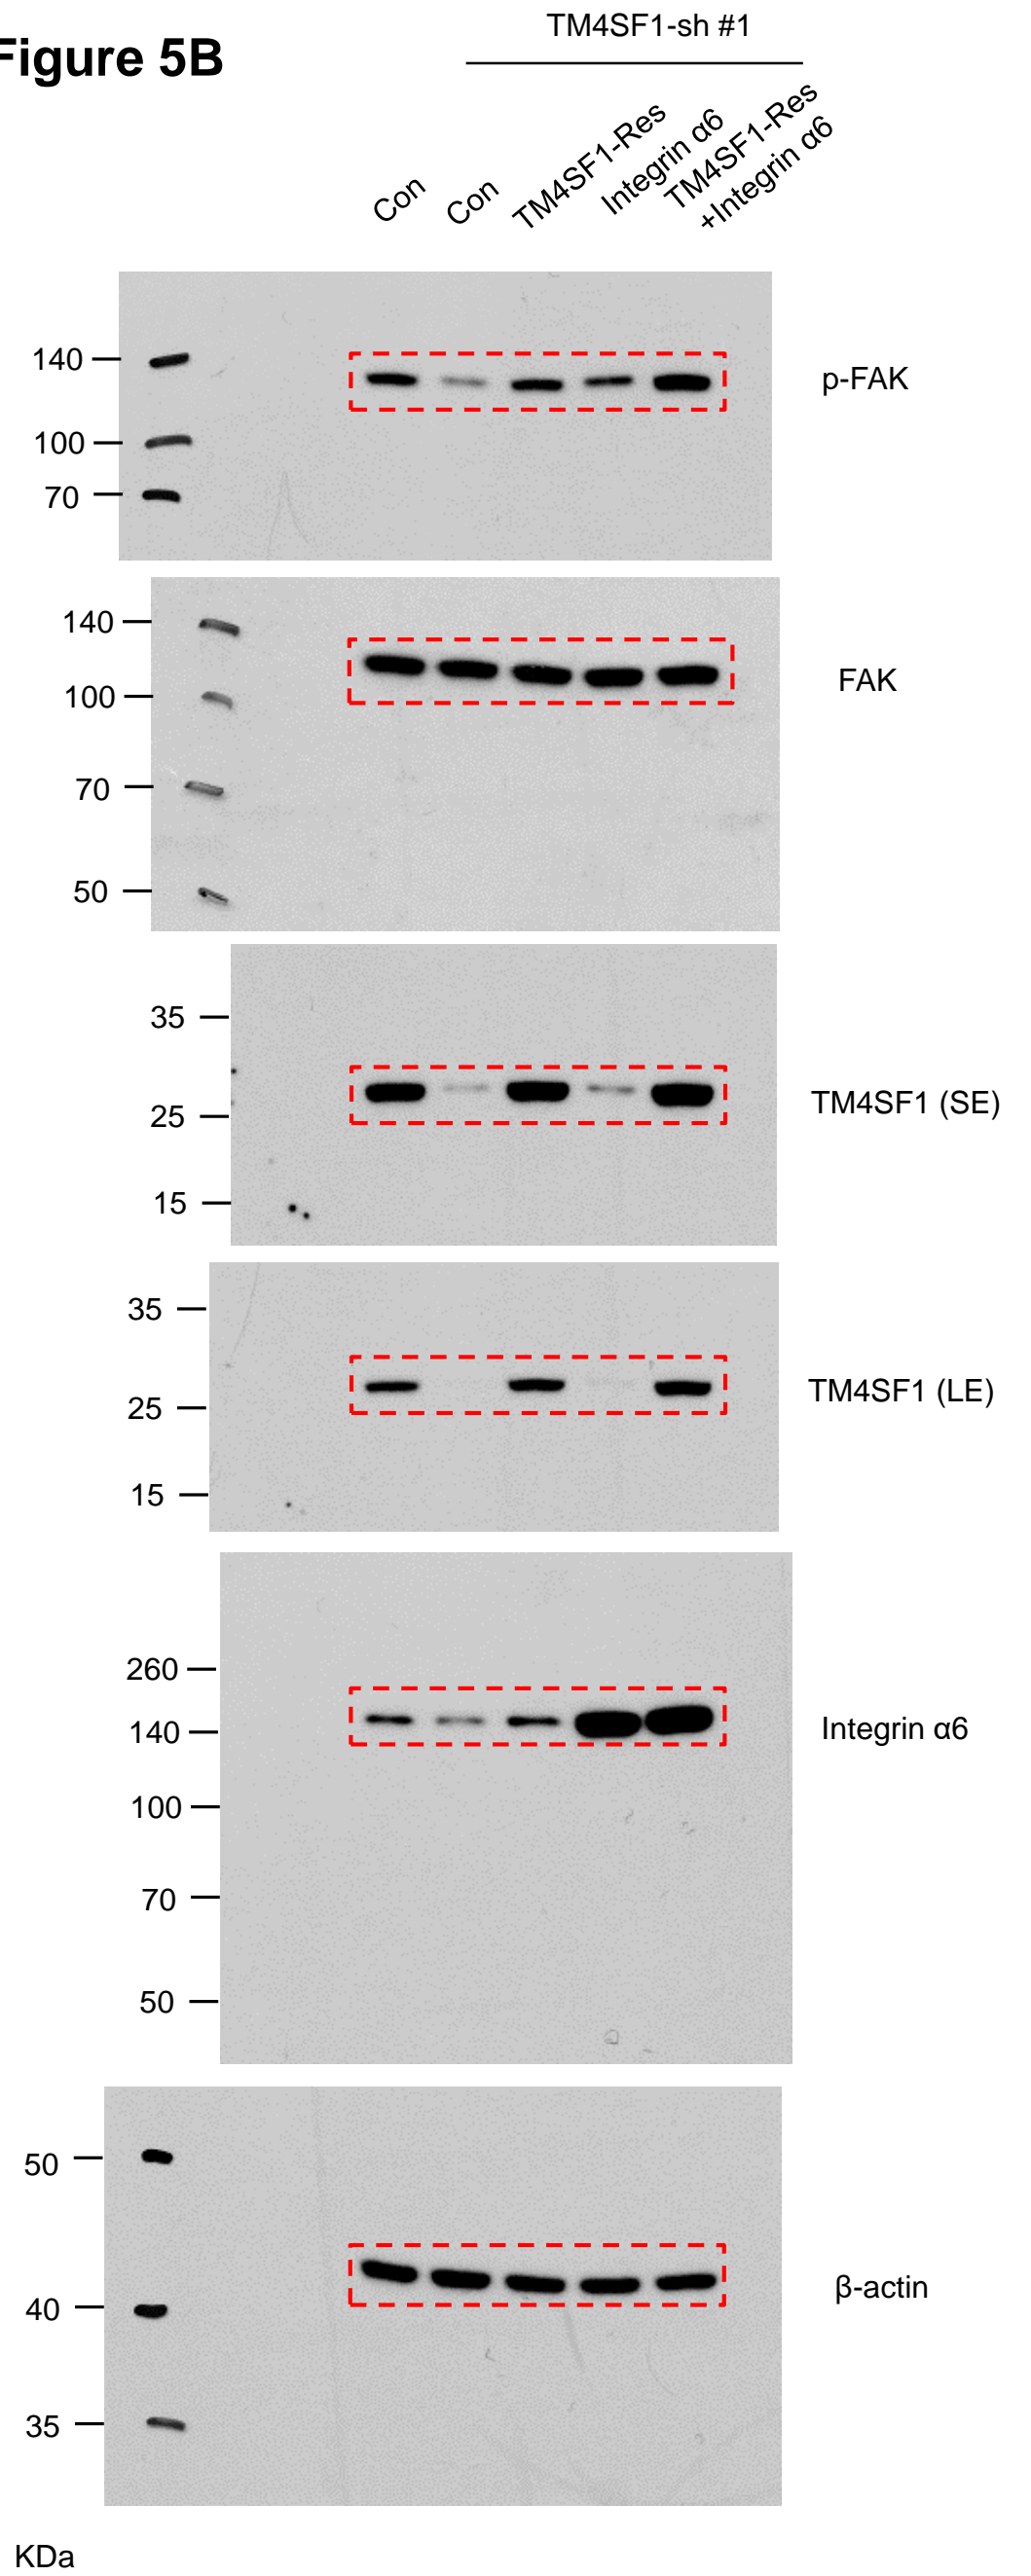

**Figure 5C**

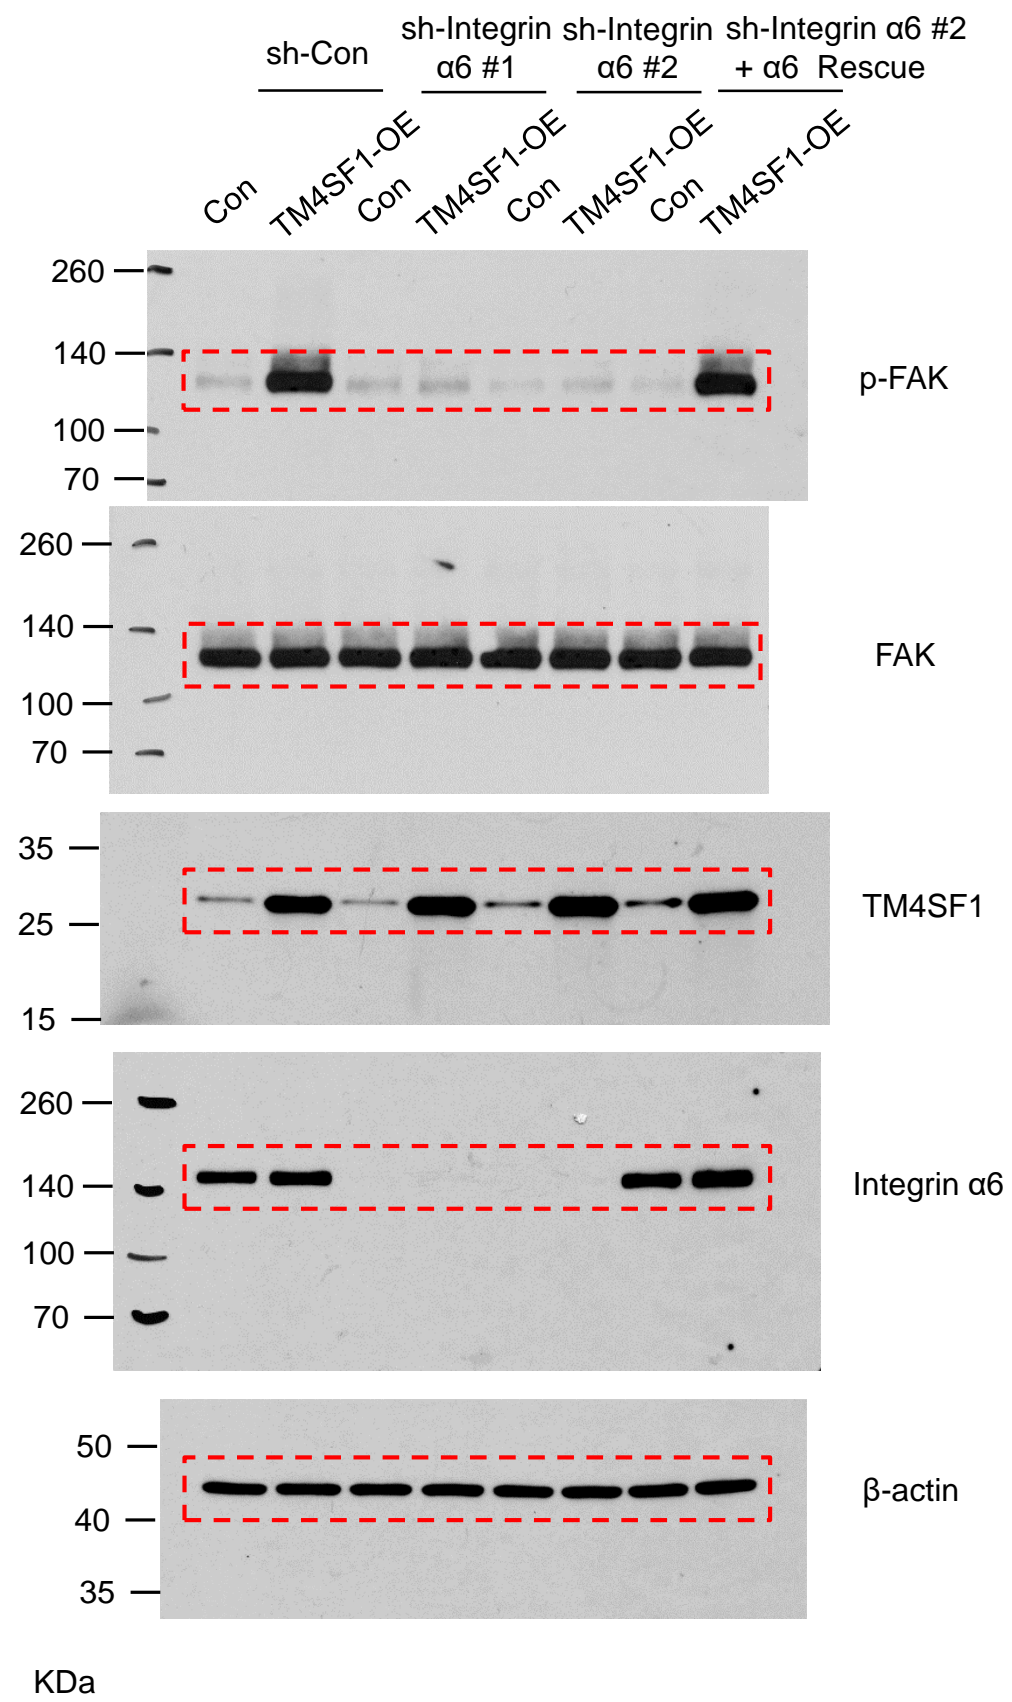

**Figure 5D**

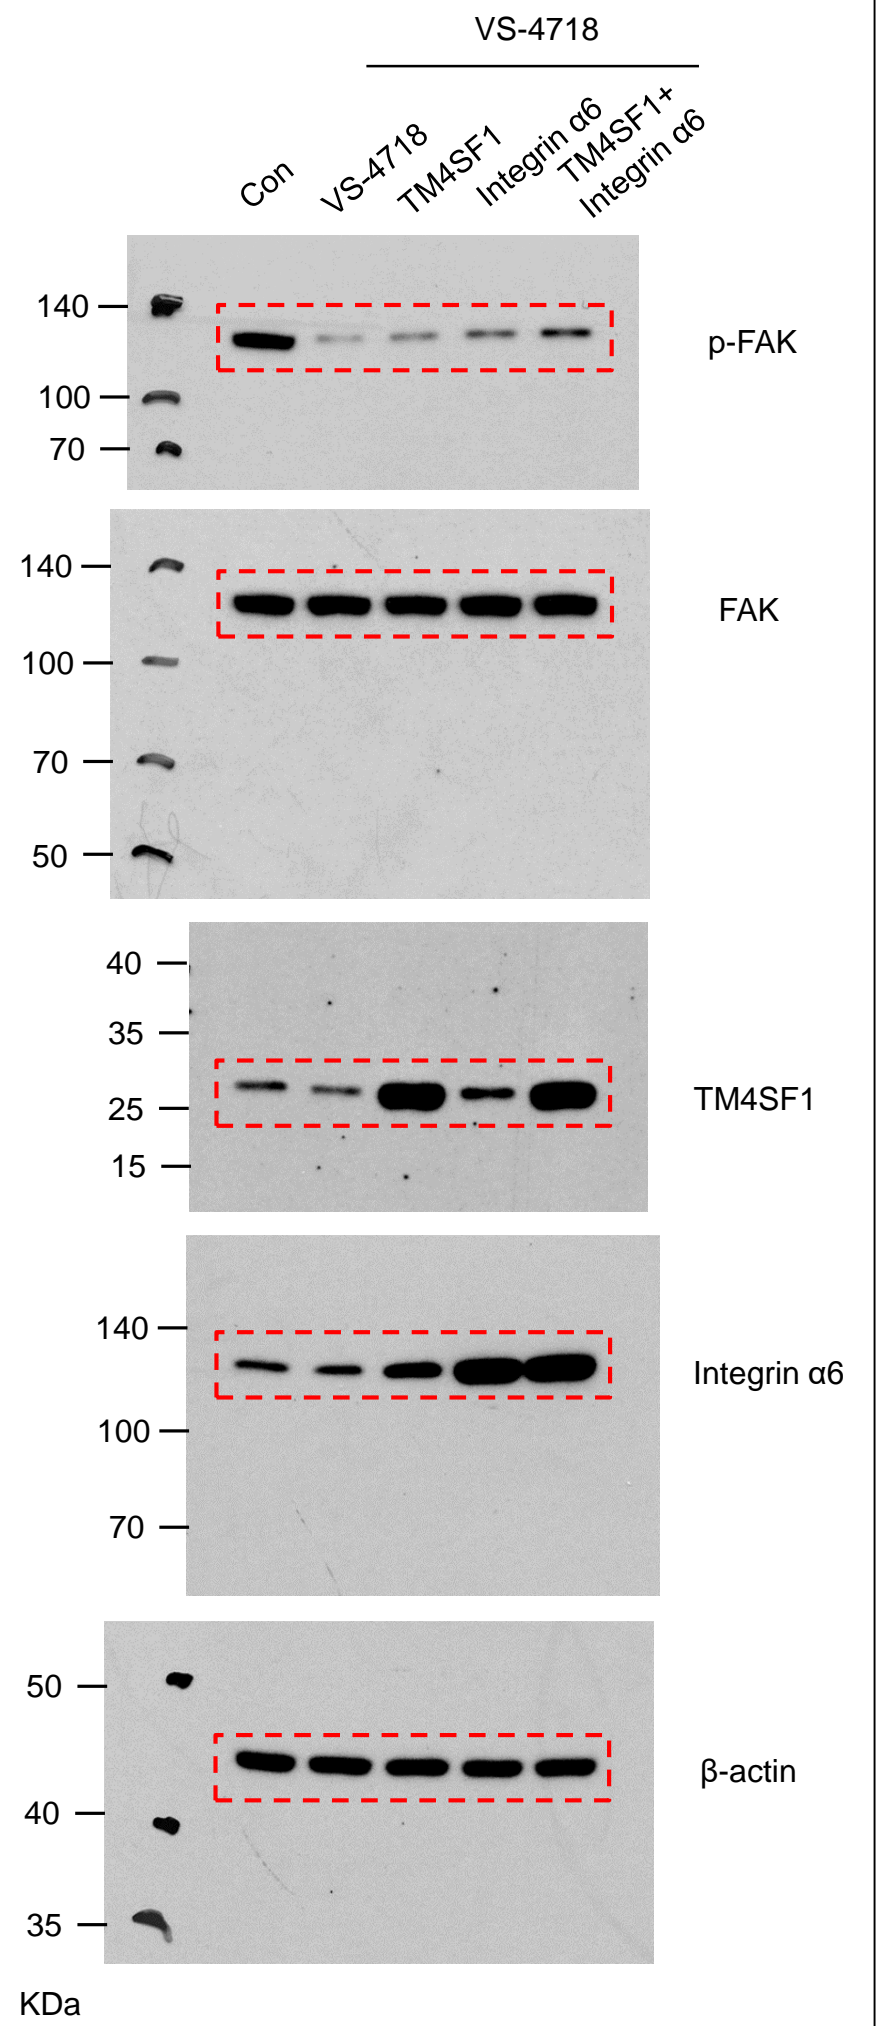

Supplement: 41419_2022_5067_MOESM3_ESM.pdf [file 41419_2022_5067_MOESM3_ESM.pdf]
